# Supplementary material
Source: PubMed Central journal article supplement (PMC4024901)
Supplement: 1406473111_pnas.201406473SI.pdf [file 1406473111_pnas.201406473SI.pdf]

# Supporting Information

Park et al. 10.1073/pnas.1406473111

## SI Materials and Methods

**ATP Bioluminescence Assay.** CD1d-tetramer-enriched iNKT cells were stained with antibodies specific for NK1.1 and CD44. Next,  $10^4$  NK1.1<sup>+</sup>CD44<sup>+</sup> iNKT cells were sorted and lysed. Basal ATP levels were determined using an ATP bioluminescence assay kit HS II according to the manufacturer's protocol (Roche) with a microplate luminometer.

**Bone Marrow Chimeras.** Mixed bone marrow chimeras were generated using a 1:1 mixture of B6.SJL-Ptprc<sup>a</sup>Peprc<sup>b</sup>/BoyJ (CD45.1) and Folliculin-interacting protein 1 (*Fnip1*)<sup>-/-</sup> (CD45.2) mice. Next,  $5 \times 10^6$  CD45.1 and CD45.2 bone marrow cells were transferred into lethally irradiated (900 rad) *Rag2*<sup>-/-</sup> $\gamma_c$ <sup>-/-</sup> mice. Bone marrow chimeras were analyzed 10 wk after transfer.

**Quantitative Real-Time PCR.** To purify stage 1, stage 2, and stage 3 invariant natural killer T (iNKT) cells, CD1d tetramer-enriched thymocytes were sorted based on CD44 and NK1.1 profiles using a FACSAria flow cytometer. RNA was extracted using RNeasy-Micro kit (Ambion). cDNA was made using SuperScript II reverse transcriptase (Invitrogen). cDNA was subjected to real-time PCR using *Fnip1*, *Gapdh*, and *PLZF*-specific primers. Primer sequences were as follows: *Fnip1* forward 5'-TGGAAAGATCTTTGCTGGGTGGCTA-3' and reverse 5'-GCTGGCCACTGAACAGTCCATT-T-3'; *Gapdh* forward 5'-TGCACCACCAACTGCTTAG-3' and reverse 5'-GAGGCAGGGATGATGTTTC-3'; *PLZF* forward 5'-GAGCAGTGCAGCGTGTGT-3' and reverse 5'-AACCGTTTTCCGCAGAGTT-3'; *V $\alpha$ 14* forward 5'-TGGGAGATACTCAGCAACTCTGG-3'; *J $\alpha$ 18* reverse 5'-CAGGTATGACAATCAGCTGAGTCC-3'; quantitative PCR analysis of transcripts of V $\alpha$ 14 and V $\alpha$ 3 rearrangements to J $\alpha$ 56, J $\alpha$ 18, and J $\alpha$ 9 was described previously (1–3). Results were normalized to C $\alpha$  transcript using the following primers: C $\alpha$  forward 5'-CCTCTGCCTGTT-CACCGACTT-3' and C $\alpha$  reverse 5'-TGGCGTTGGTCTCTTT-GAAG-3'. PCR amplification was performed with the Brilliant qPCR kit (Stratagene) using an Applied Biosystems 7300 Real-Time PCR System.

**Flow Cytometry and Cell Sorting.** Thymus, spleen, and liver cells were stained with fluorescent-conjugated antibodies specific for NK1.1, T-cell receptor- $\beta$  (TCR- $\beta$ ), TCR- $\gamma\delta$ , CD4, CD8, B220, IgM, CD45.1, CD45.2, CD24, CD44, CD244.2, CD94, CD69, CD122, Ly-49G2, CD1d, CD150, CD1d/ $\alpha$ GalCer dimer (BD DimerX), mCD1d/PBS57 (National Institutes of Health tetramer core facility, Emory University, Atlanta, GA), and NKG2D. Intracellular staining for phospho-S6 ribosomal protein (Ser-235/236; Cell signaling), Ror $\gamma$ t, early growth response protein 2 (Egr2), Runt-related transcription factor (Runx)1, T-box transcription factor, Tbx21 (T-bet), and promyelocytic leukaemia zinc finger (PLZF) were performed according to the manufacturer's protocol (eBioscience). CD1d/ $\alpha$ GalCer dimer and mCD1d/PBS57 tetramer are designated as "CD1d tetramer" for convenience in the text.

**In Vivo BrdU Labeling and Apoptosis Assays.** Mice were given 0.8 mg/mL BrdU (Sigma-Aldrich) by intraperitoneal injection. Total thymocytes were harvested 24 h later, stained with biotinylated CD1d dimer, and enriched by the MACS system. Purified cells or total thymocyte were surface-stained with antibodies specific for CD44 and NK1.1 or with CD1d tetramer and TCR- $\beta$ . Cells were fixed, permeabilized, and treated with 30  $\mu$ g DNase I (Sigma-Aldrich). Incorporation of BrdU into DNA was measured by flow cytometry using anti-BrdU-FITC (BD Biosciences) according to the manufacturer's protocol. Apoptosis was detected with CellEvent Caspase 3/7 green detection (Life Technologies) system and dead cells were excluded with near-IR dead cell stain kit (Life Technologies).

**Analysis of Mitochondrial Mass and Superoxide Production.** Thymocytes from WT and *Fnip1*<sup>-/-</sup> mice were stained with MitoTracker Green FM (25 nM) or MitoSox (5  $\mu$ M; Life Technologies) in conjunction with CD1d tetramer, CD44, NK1.1. Cells in culture media [RPMI/5% (vol/vol) FBS] were incubated for 30 min at 37 °C.

1. D'Cruz LM, Knell J, Fujimoto JK, Goldrath AW (2010) An essential role for the transcription factor HEB in thymocyte survival, Tcr $\alpha$  rearrangement and the development of natural killer T cells. *Nat Immunol* 11(3):240–249.
2. Hu T, Simmons A, Yuan J, Bender TP, Alberola-Ila J (2010) The transcription factor c-Myb primes CD4<sup>+</sup>CD8<sup>+</sup> immature thymocytes for selection into the iNKT lineage. *Nat Immunol* 11(5):435–441.

3. Gapin L, Matsuda JL, Surh CD, Kronenberg M (2001) NKT cells derive from double-positive thymocytes that are positively selected by CD1d. *Nat Immunol* 2(10):971–978.

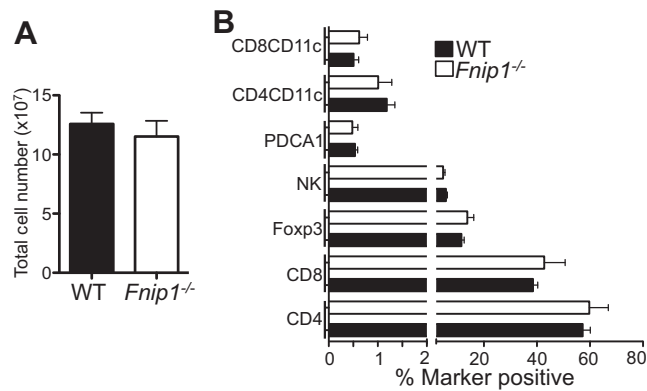

**Fig. S1.** Normal total number of thymocytes and representation of splenic CD4, CD8, T regulatory (Treg), NK, and dendritic cells in *Fnip1*<sup>-/-</sup> mice. (A) Total thymocyte numbers are shown ( $n = 5$  mice per group). (B) Splenocytes were stained for CD4 ( $n = 9$  mice per group), CD8 ( $n = 6$  mice per group), Foxp3 ( $n = 4$  mice per group), PDCA1 ( $n = 6$  mice per group), CD11c ( $n = 5$  mice per group), TCR- $\beta$ , B220, and NK1.1 ( $n = 8$  mice per group). Cells that fall within the specified gates are displayed by the mean percentage (relative to TCR- $\beta$ <sup>+</sup> or B220<sup>-</sup> cells)  $\pm$  SEM.

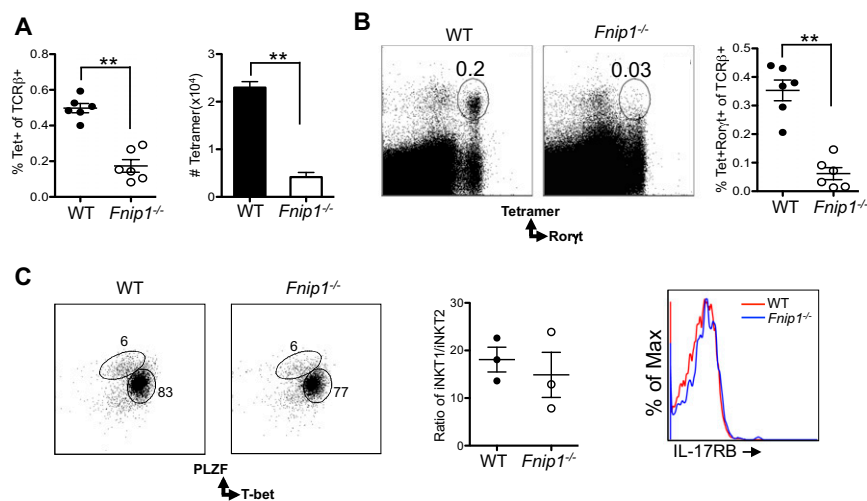

**Fig. S2.** Analysis of different lineages of iNKT cells in *Fnip1*<sup>-/-</sup> mice. (A and B) Cells from inguinal and axillary lymph nodes were stained with TCR- $\beta$ , CD1d tetramer, and intracellular Roryt. (A) The percentage and total number of Tet<sup>+</sup>TCR- $\beta$ <sup>+</sup> cells are reduced in *Fnip1*<sup>-/-</sup> mice. (B) A separate lineage of Roryt<sup>+</sup> iNKT cell (iNKT17) development is greatly impaired in *Fnip1*<sup>-/-</sup> mice. (C) Ratio of iNKT1:iNKT2 cells is not altered in splenic *Fnip1*<sup>-/-</sup> iNKT cells. Splenocytes from WT and *Fnip1*<sup>-/-</sup> mice were stained with CD1d tetramer, anti-TCR- $\beta$ , and intracellular PLZF and T-bet. The ratios of PLZF<sup>high</sup>T-bet<sup>low</sup> (iNKT2) and PLZF<sup>low</sup>T-bet<sup>high</sup> (iNKT1) within tetramer-positive cells are shown. For IL-17RB staining, cells were stained with CD1d tetramer and antibodies specific to CD4 (IgG2b) and IL-17RB (MBL, B5F6) followed by staining with anti IgG2a FITC. Histogram for IL-17RB is shown within CD4<sup>+</sup>CD1d<sup>+</sup> cells. Representative FACS dot-plots and histogram are shown from three to six mice per group. Shown are the mean  $\pm$  SEM. \*\* $P < 0.0001$  (unpaired  $t$  test).

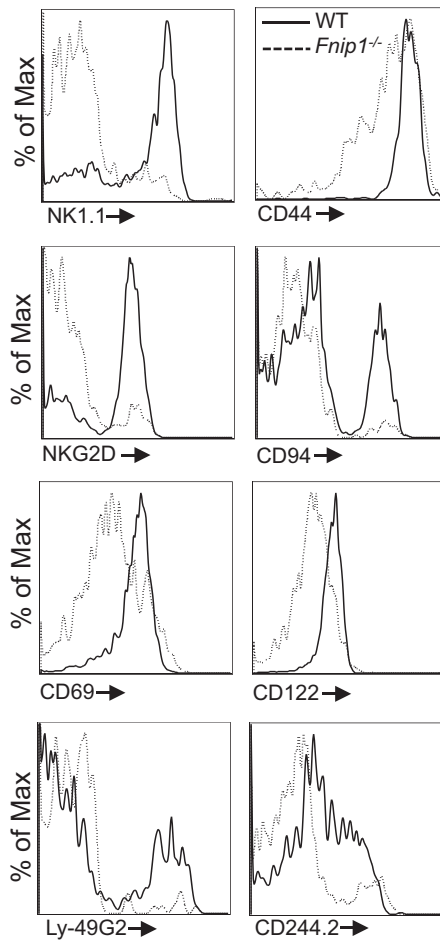

**Fig. 53.** iNKT cells from *Fnip1*<sup>-/-</sup> mice are arrested at an immature cell stage. Thymic CD1d tetramer-positive cells were stained with antibodies specific for the indicated surface proteins. Shown are representative flow cytometric histogram from *n* = 3 mice per group.

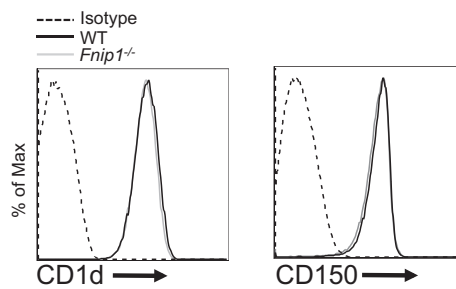

**Fig. 54.** CD1d and CD150 (SLAM, signaling lymphocyte activation molecule) are expressed normally on *Fnip1*<sup>-/-</sup> thymocytes. Thymocytes were stained with antibodies specific for CD4, CD8, CD1d, and CD150. Expression of CD1d and CD150 were analyzed on CD4<sup>+</sup>CD8<sup>+</sup> double-positive (DP) thymocytes. Representative FACS histograms are shown from *n* = 3 mice per group.

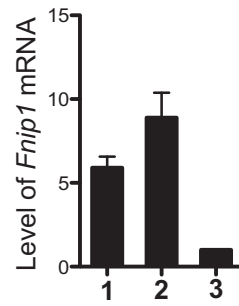

**Fig. S5.** *Fnip1* expression is decreased in Stage 3 iNKT cells relative to stage 1 and 2 iNKT cells. Total iNKT cells were enriched from WT thymocytes by tetramer selection using magnetic beads. iNKT developmental subsets were FACS-sorted based on CD44 and NK1.1 expression and *Fnip1* and *Gapdh* expression were analyzed by real-time PCR. Shown is the mean ± SEM of three mice per group.

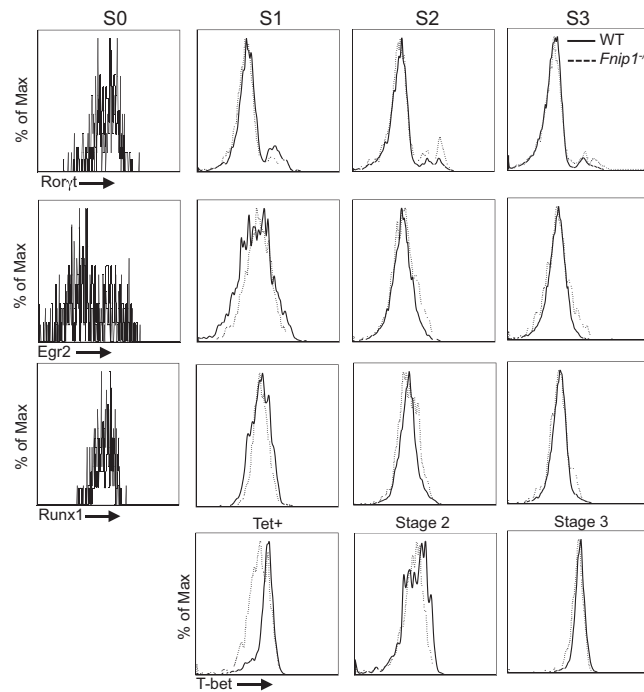

**Fig. S6.** Intracellular staining for Ror $\gamma$ t, Egr2, Runx1, and T-bet proteins during development of *Fnip1*<sup>-/-</sup> and WT iNKT cells. Cells were stained with CD24, CD44, NK1.1, CD1d tetramer, and intracellular Ror $\gamma$ t, Egr2, and Runx1. Intracellular staining for T-bet was performed on thymocytes stained with NK1.1, CD44, and CD1d tetramer. Data are representative of five mice (stage 0 of Ror $\gamma$ t, Egr2, Runx1), and seven mice (T-bet) per group.

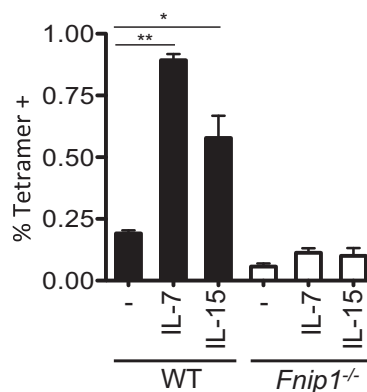

**Fig. S7.** Reduced *Fnip1*<sup>-/-</sup> iNKT precursor cell response following culture in IL-7 and IL-15. Total thymocytes ( $5 \times 10^6$  cells) were cultured in 24-well plates for 48 h in the presence of cytokines (each 10 ng/mL). Cells were stained with TCR- $\beta$  and CD1d tetramer. Shown is the mean ± SEM of  $n = 3$  mice per group. \* $P < 0.05$  (unpaired  $t$  test), \*\* $P < 0.0001$  (unpaired  $t$  test).
